# Supplementary material
Source: PubMed Central journal article supplement (PMC7204592)
Supplement: tpmd190616.SD1.pdf [file tpmd190616.SD1.pdf]

Supplemental Table 1. Search strategy

| Database         | Search Terms                                                                                                                                                                                                                                                                                                                                                                                                                                                                                                                                                                                                                                                                              |
|------------------|-------------------------------------------------------------------------------------------------------------------------------------------------------------------------------------------------------------------------------------------------------------------------------------------------------------------------------------------------------------------------------------------------------------------------------------------------------------------------------------------------------------------------------------------------------------------------------------------------------------------------------------------------------------------------------------------|
| PubMed           | (tumor necrosis factor OR TNF OR adalimumab OR adalimumab [MeSH] OR certolizumab OR certolizumab [MeSH] OR etanercept OR etanercept [MeSH] OR golimumab OR infliximab OR infliximab[MeSH] OR rituximab OR rituximab[MeSH] OR secukinumab OR ustekinumab OR ustekinumab[MeSH] OR ixekizumab OR anakinra OR anakinra[MeSH] OR canakinumab OR omalizumab OR basiliximab OR muromonab OR muromonab[MeSH] OR efalizumab OR daclizumab OR abatacept OR abatacept[MeSH] OR natalizumab OR natalizumab[MeSH] OR alefacept OR vedolizumab OR brodalumab OR tocilizumab OR belimumab OR siltuximab OR dupilumab) AND (lepra* OR lepro* OR leper OR leprosy[MeSH] OR Hansen*[Title/Abstract] OR ENL) |
| Cochrane Library | (tumor necrosis factor OR TNF OR adalimumab OR certolizumab OR etanercept OR golimumab OR infliximab OR rituximab OR secukinumab OR ustekinumab OR ixekizumab OR anakinra OR canakinumab OR omalizumab OR basiliximab OR muromonab OR efalizumab OR daclizumab OR abatacept OR natalizumab OR alefacept OR vedolizumab OR brodalumab OR tocilizumab OR belimumab OR siltuximab OR dupilumab) AND (lepra OR lepro OR leper OR leprosy OR Hansen OR ENL) NOT (Hansen-author)                                                                                                                                                                                                                |

LILACS

(tumor necrosis factor OR TNF OR adalimumab OR certolizumab OR etanercept OR golimumab OR infliximab OR rituximab OR secukinumab OR ustekinumab OR ixekizumab OR anakinra OR canakinumab OR omalizumab OR basiliximab OR muromonab OR efalizumab OR daclizumab OR abatacept OR natalizumab OR alefacept OR vedolizumab OR brodalumab OR tocilizumab OR belimumab OR siltuximab OR dupilumab) AND (lepra OR lepro OR leper OR leprosy OR Hansen OR ENL)
